# Supplementary material
Source: publisher site journal article supplement (https://cdn.jamanetwork.com/ama/content_public/journal/jama/28989/joc120119_supp.pdf)
Supplement: Supplementary file 1 [file joc120119_supp.pdf]

## Supplementary Online Content

Eva KW, Reiter HI, Rosenfeld J, Trinh K, Wood TJ, Norman GR. Association between a medical school admission process using the multiple mini-interview and national licensing examination scores. *JAMA*.

doi:10.1001/jama.2012.9630.

eTable 1. Comparison of Medical Council of Canada Qualifying Examination (MCCQE) Part I data for participants who were accepted to McMaster and whose admissions data could be matched to Part I performance

eTable 2. Comparison of Medical Council of Canada Qualifying Examination (MCCQE) Part II data for participants who were accepted to McMaster and whose admissions data could be matched to Part II performance

This supplementary material has been provided by the authors to give readers additional information about their work.

eTable 1. Comparison of Medical Council of Canada Qualifying Examination (MCCQE) Part I data for participants who were accepted to McMaster and whose admissions data could be matched to Part I performance

| Variable                                                                                                  |                       | All interviewees who were accepted to McMaster and could be matched to Part I (n=402 <sup>a</sup> ) | Accepted candidates who matriculated at McMaster (n=274) | Accepted candidates who matriculated elsewhere (n=128) | Statistics <sup>b</sup>  |
|-----------------------------------------------------------------------------------------------------------|-----------------------|-----------------------------------------------------------------------------------------------------|----------------------------------------------------------|--------------------------------------------------------|--------------------------|
| MCCQE Part I Total Score                                                                                  | Mean (SD)<br>[95% CI] | 531 (71.8)<br>[524 – 538]                                                                           | 524 (74.9)<br>[515 – 533]                                | 546 (62.4)<br>[535 – 557]                              | F=8.3,p=.004;<br>d=.32   |
| MCCQE Part I Multiple Choice Component                                                                    | Mean (SD)<br>[95% CI] | 541 (76.2)<br>[533 – 548]                                                                           | 532 (79.3)<br>[522 – 541]                                | 560 (65.7)<br>[548 – 571]                              | F=12.06,p=.001;<br>d=.39 |
| MCCQE Part I Clinical Decision Making Component                                                           | Mean (SD)<br>[95% CI] | 472 (73.1)<br>[464 – 479]                                                                           | 472 (75.2)<br>[463 – 481]                                | 471 (68.9)<br>[459 – 483]                              | F=.005,p=.95;<br>d=.01   |
| MCCQE Part I Considerations of the Ethical, Legal, and Organizational (CLEO) Aspects of Practice Subscore | Mean (SD)<br>[95% CI] | 525 (81.2)<br>[517 – 533]                                                                           | 516 (81.1)<br>[506 – 525]                                | 545 (78.3)<br>[531 – 558]                              | F=11.3,p=.001;<br>d=.36  |

<sup>a</sup>The 402 participants included in this analysis do not sum to the 472 “Accepted” participants included in the main analysis because data regarding site of matriculation was not available for 70 participants who could be matched based on Part I scores

<sup>b</sup>P-values and d-values reflect comparison between interviewees who were accepted by the McMaster undergraduate MD admissions protocol and matriculated at McMaster and those who were accepted, but matriculated elsewhere. d refers to Cohen’s d, the difference between means divided by the pooled standard deviation.

eTable 2. Comparison of Medical Council of Canada Qualifying Examination (MCCQE) Part II data for participants were accepted to McMaster and whose admissions data could be matched to Part II performance

| Variable                                                                                                   |                       | All interviewees who were accepted to McMaster and could be matched to Part II (n=376) | Accepted candidates who matriculated at McMaster (n=264) | Accepted candidates who matriculated elsewhere (n=112) | Statistics <sup>b</sup> |
|------------------------------------------------------------------------------------------------------------|-----------------------|----------------------------------------------------------------------------------------|----------------------------------------------------------|--------------------------------------------------------|-------------------------|
| MCCQE Part II Total Score                                                                                  | Mean (SD)<br>[95% CI] | 564 (73.3)<br>[557 – 572]                                                              | 557 (75.2)<br>[548 – 566]                                | 582 (66.0)<br>[569 – 594]                              | F=8.9,p=.003; d=.35     |
| MCCQE Part II Data Gathering Subscore                                                                      | Mean (SD)<br>[95% CI] | 544 (82.0)<br>[536 – 552]                                                              | 535 (82.9)<br>[525 – 545]                                | 564 (76.4)<br>[550 – 578]                              | F=9.8,p=.002; d=.36     |
| MCCQE Part II Problem Solving Subscore                                                                     | Mean (SD)<br>[95% CI] | 539 (81.7)<br>[531 – 547]                                                              | 531 (83.2)<br>[521 – 541]                                | 558 (75.2)<br>[543 – 572]                              | F=8.2,p=.004; d=.34     |
| MCCQE Part II Patient Interaction Subscore                                                                 | Mean (SD)<br>[95% CI] | 560 (69.0)<br>[553 – 567]                                                              | 557 (67.7)<br>[549 – 566]                                | 568 (72.0)<br>[554 – 581]                              | F=1.7,p=.19; d=.16      |
| MCCQE Part II Considerations of the Ethical, Legal, and Organizational (CLEO) Aspects of Practice Subscore | Mean (SD)<br>[95% CI] | 554 (75.7)<br>[546 – 561]                                                              | 552 (74.7)<br>[543 – 561]                                | 558 (78.1)<br>[543 – 572]                              | F=.41,p=.52; d=.08      |

<sup>a</sup>The 376 participants included in this analysis do not sum to the 437 “Accepted” participants included in the main analysis because data regarding site of matriculation was not available for 61 participants who could be matched based on Part II scores

<sup>b</sup>P-values and d-values reflect comparison between interviewees who were accepted by the McMaster undergraduate MD admissions protocol and matriculated at McMaster and those who were accepted, but matriculated elsewhere. d refers to Cohen’s d, the difference between means divided by the pooled standard deviation.
